# Supplementary material
Source: PubMed Central journal article supplement (PMC2758074)

Supplemental Figure 1  
Effect of MAL2-11B on TAg ATPase activity in the  
absence of DNA  
(N = 4) +/- SD

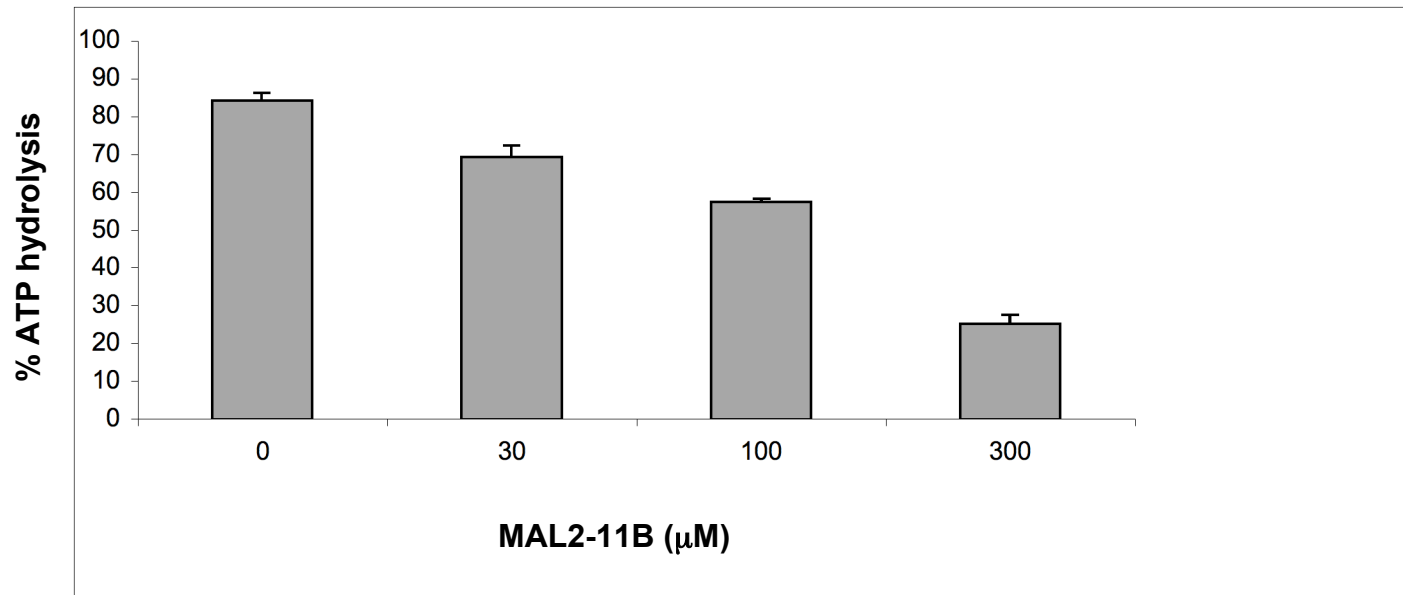

Supplement: NIHMS132836-supplement-Supplemental.pdf [file NIHMS132836-supplement-Supplemental.pdf]
